# Supplementary material for: Multicolor tuning and white light emission from lanthanide doped YPVO4nanorods: energy transfer studies
Source: Royal Society of Chemistry journal article supplement (doi:10.1039/c3tc31586j), 2013-10-23
Supplement: c3tc31586j.pdf [file c3tc31586j.pdf]

## Electronic Supplementary Information

### Multicolor tuning and white light emission from lanthanide doped YPVO<sub>4</sub> nanorods:

#### Energy transfer studies

N. Shanta Singh, Niroj Kumar Sahu, D. Bahadur\*

Department of Metallurgical Engineering & Materials Science  
Indian Institute of Technology Bombay, Mumbai – 400076, India

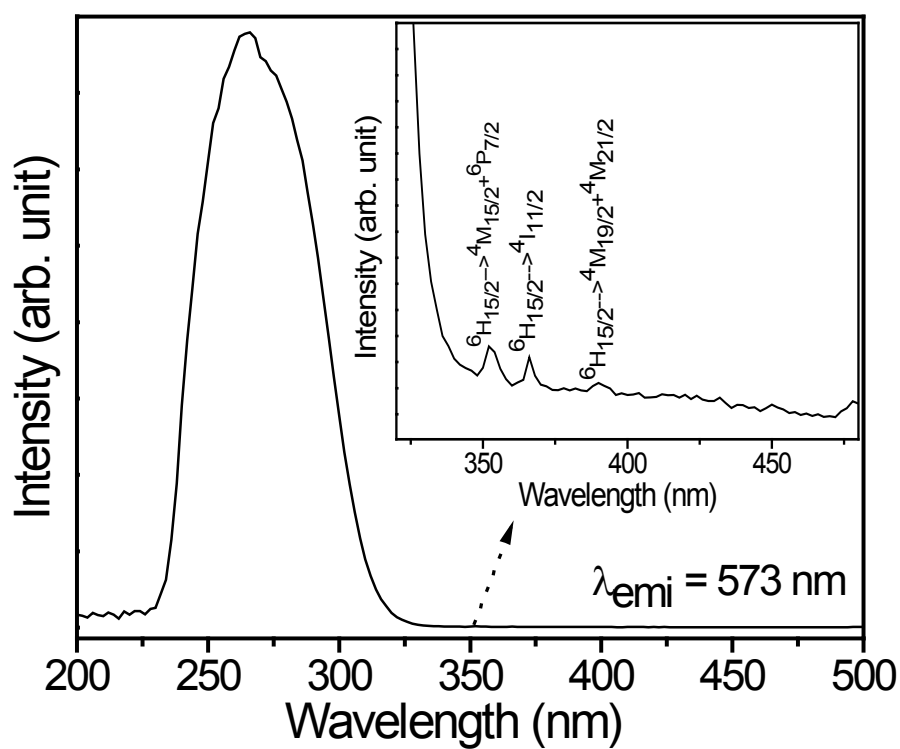

Fig. S1 The excitation spectrum ( $\lambda_{\text{emission}} = 573 \text{ nm}$ ) of YP<sub>0.85</sub>V<sub>0.15</sub>O<sub>4</sub>:Dy<sup>3+</sup> (1 at.%). Inset shows the expanded portion (325-475 nm) showing *f-f* transition absorption.

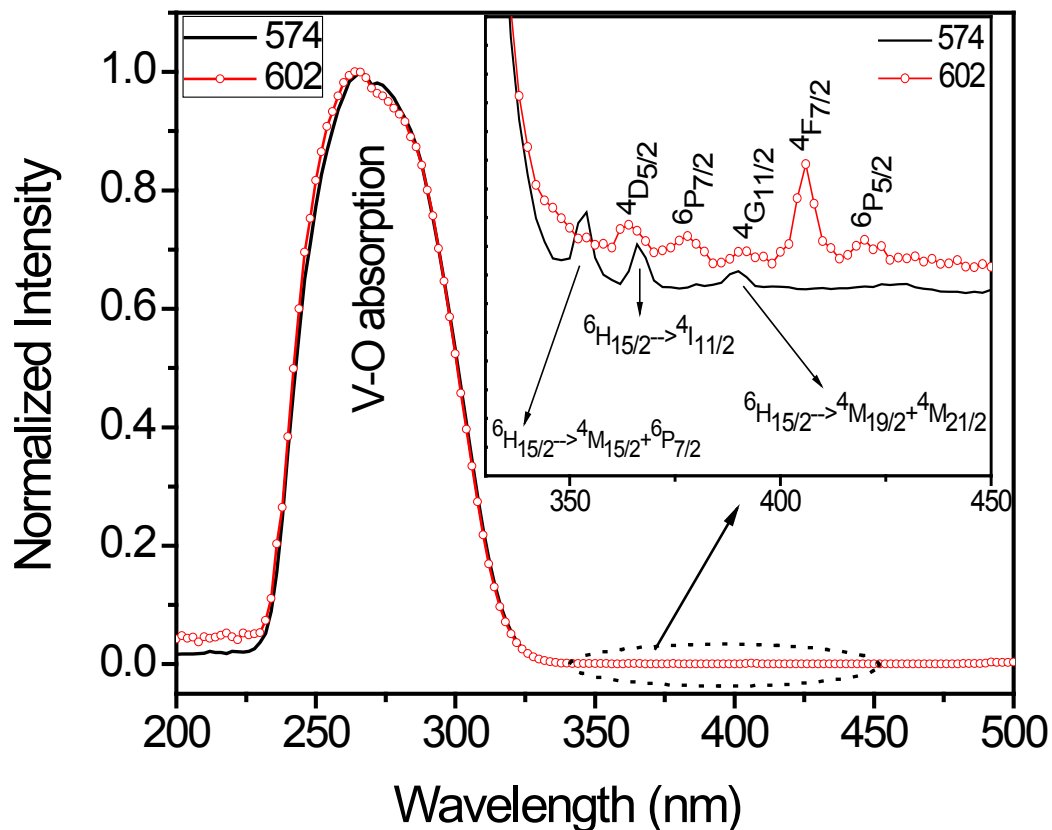

Fig. S2 Excitation spectra of  $\text{Sm}^{3+}$  (0.75 at.%) co-activated with  $\text{Dy}^{3+}$  (1 at.%) in  $\text{YP}_{0.8}\text{V}_{0.2}\text{O}_4$  nanorods at different emission wavelengths (602 nm,  $\text{Sm}^{3+}$  and 574 nm,  $\text{Dy}^{3+}$ ). Inset shows the respective  $f-f$  transition absorptions.

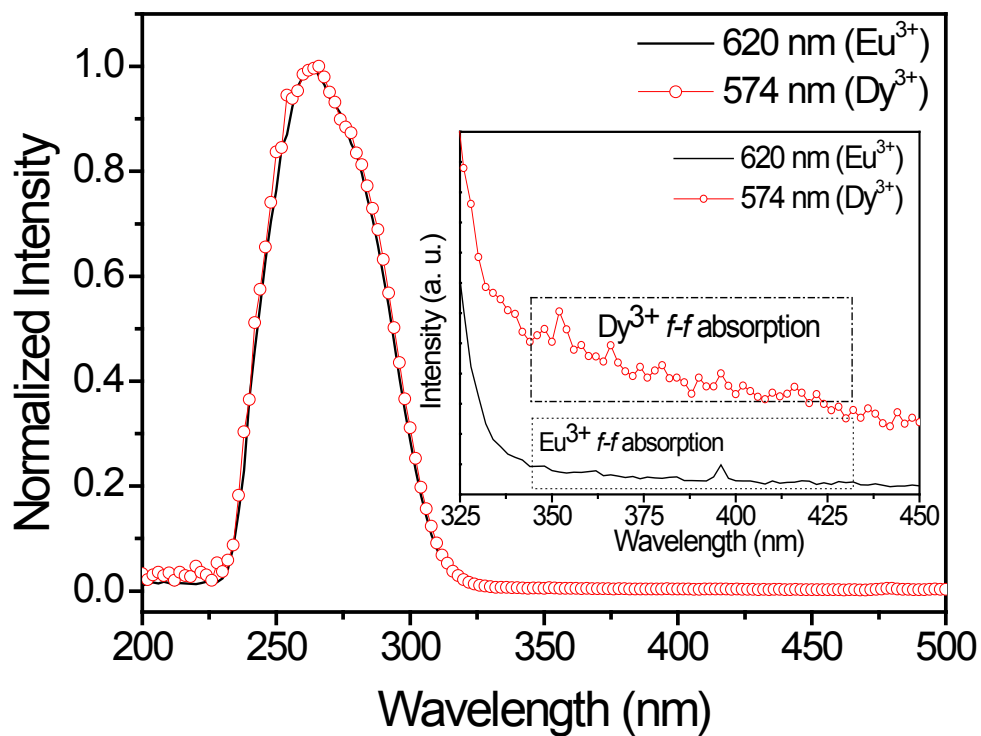

**Fig. S3** Excitation spectra of Eu<sup>3+</sup> (1 at.%) co-activated with Dy<sup>3+</sup> (0.5 at.%) in YP<sub>0.8</sub>V<sub>0.2</sub>O<sub>4</sub> nanorods monitoring at different emission wavelengths (620 nm, Eu<sup>3+</sup> and 574 nm, Dy<sup>3+</sup>). Inset shows the respective *f-f* transition absorptions.

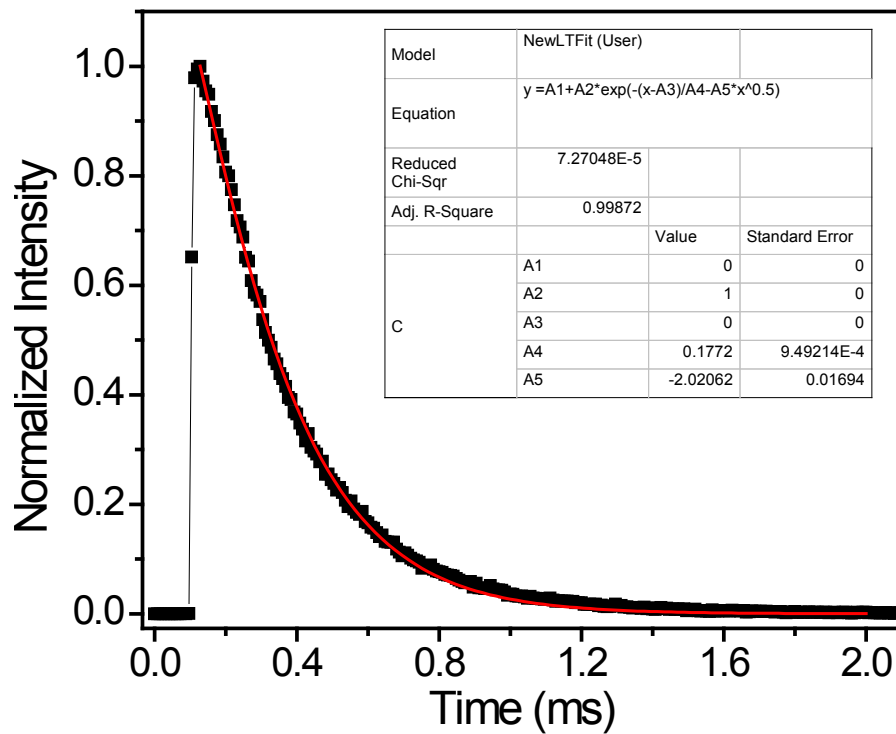

Fig. S4 Typical fitting of  $YP_{0.8}V_{0.2}O_4:Dy^{3+}$  (1.5 at.%) using equation 2 in the main text.

**Table S1** Luminescence decay lifetimes of Dy<sup>3+</sup> (different concentrations) and VO<sub>4</sub><sup>3-</sup> in YP<sub>0.8</sub>V<sub>0.2</sub>O<sub>4</sub>.

| Dy <sup>3+</sup> (at.%) in<br>YP <sub>0.8</sub> V <sub>0.2</sub> O <sub>4</sub> | τ <sub>V-O</sub> (μs) | R <sup>2</sup> | τ <sub>Dy</sub> (μs) | R <sup>2</sup> |
|---------------------------------------------------------------------------------|-----------------------|----------------|----------------------|----------------|
| 0.1                                                                             | 60±3                  | 0.99           | 163±2                | 0.99           |
| 0.25                                                                            | 48±2                  | 0.98           | 265±2                | 0.99           |
| 0.5                                                                             | 53±2                  | 0.99           | 236±2                | 0.99           |
| 0.75                                                                            | 35±2                  | 0.99           | 216±2                | 0.99           |
| 1.0                                                                             | 15±1                  | 0.99           | 204±2                | 0.99           |
| 1.5                                                                             | 10±1                  | 0.98           | 184±2                | 0.99           |
| 2.0                                                                             | 6±0.3                 | 0.99           | 177±3                | 0.99           |
| 3.0                                                                             | 4±0.3                 | 0.98           | 170±4                | 0.99           |
